# Supplementary material for: Invited perspectives: The ECMWF strategy 2021–2030 Challenges inthe area of natural hazards
Source: Copernicus journal article supplement (doi:10.5194/nhess-2021-33), 2021-02-10
Supplement: Supplementary file [file nhess-2021-33-AC5-supplement.pdf]

## Response to RC2

The perspective provides a clear picture of the ECMWF's intentions for the next decade. It describes the intended progress from the present practice, describing several key components for a development of capabilities rather than a single step change. These include, in particular, data availability and use, system understanding, computer resources and programming techniques, and human capital.

My impression is that just a few minor improvements of readability of this perspective are possible, which I mention below.

Thank you very much!

**Abstract:** I am aware that the collaboration with the member states (and further partners) is important, but this aspect is not taken up in the rest of the manuscript. Would part of the strategy, for example, include a development of the collaboration with member states beyond the present practice, for example in terms of computing, use of results, or personnel?

We will follow the reviewers recommendation and include more examples through out the text.

**Introduction:** As the conclusions mention forecasts of high impact weather at the medium-range time scale of a couple of weeks, I wonder if they it would be worthwhile also to mention them in the introductory section.

Done

**Science and Technology:** Is the mentioning on remote sensing from satellites and IoT-data, but not of Radar, intentional?

An oversight, thank you for pointing it out

**People:** While the job market aspect is clearly important, I wonder if cooperation aspects (e.g., with the member states) might be worthwhile to be briefly mentioned.

Excellent point - included
